# Supplementary material
Source: Springer Nature journal article supplement (https://www.springermedizin.de/resource/supplementary/12913_2006_428_MOESM1_ESM.pdf/9535186)

**Population  
Pyramid, Australia 2005**

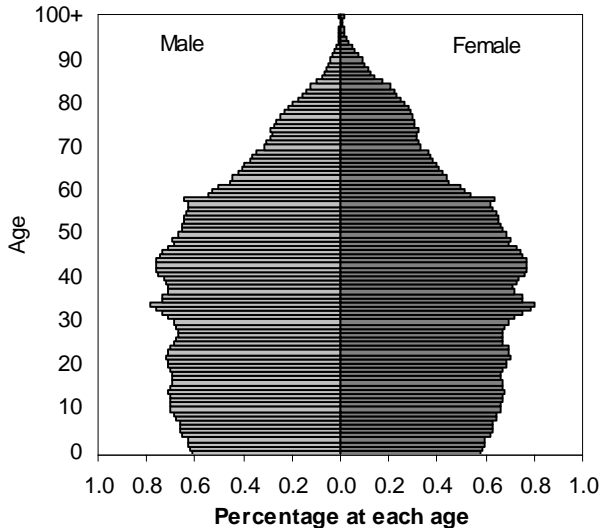

Source ABS 3222.0

**Population  
Pyramid, Australia 2025**

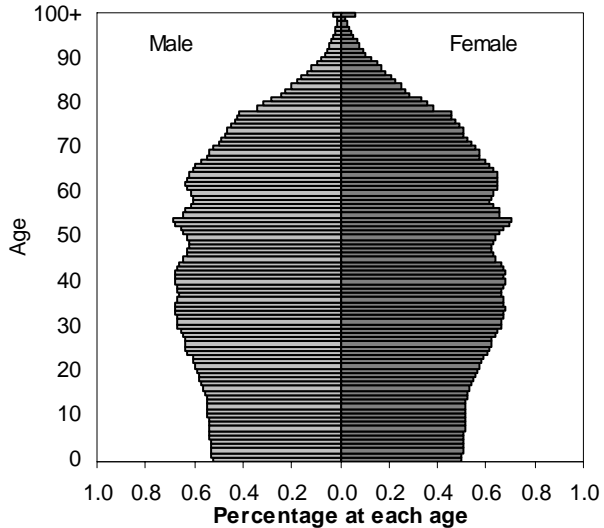

Source ABS 3222.0

Supplement: MOESM1 [file 9535186]
